CORRECTION

# Correction: A Leafhopper-Transmissible DNA Virus with Novel Evolutionary Lineage in the Family *Geminiviridae* Implicated in Grapevine Redleaf Disease by Next-Generation Sequencing

Sudarsana Poojari, Olufemi J. Alabi, Viacheslav Y. Fofanov, Rayapati A. Naidu

[Table 2](#) is missing information regarding GVGF and GVGR. Please see the corrected [Table 2](#) here.

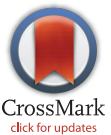

## OPEN ACCESS

**Citation:** Poojari S, Alabi OJ, Fofanov VY, Naidu RA (2016) Correction: A Leafhopper-Transmissible DNA Virus with Novel Evolutionary Lineage in the Family *Geminiviridae* Implicated in Grapevine Redleaf Disease by Next-Generation Sequencing. PLoS ONE 11(1): e0147510. doi:10.1371/journal.pone.0147510

**Published:** January 15, 2016

**Copyright:** © 2016 Poojari et al. This is an open access article distributed under the terms of the [Creative Commons Attribution License](#), which permits unrestricted use, distribution, and reproduction in any medium, provided the original author and source are credited.

**Table 2. Oligonucleotide primers used for amplification of virus- and viroid-specific sequences by RT-PCR and PCR.**

| Name                                                       | Sequence                 | Genome Position (from 5' end) |
|------------------------------------------------------------|--------------------------|-------------------------------|
| <b>For genome characterization of GRLaV:</b>               |                          |                               |
| GRLaV-1-For                                                | CCCATGGTACGTGGTATTCTTGCG | 11–34                         |
| GRLaV-1-Rev                                                | CAGTCCAGTAGGAAACCGATC    | 1033–1054                     |
| GRLaV-2-For                                                | GGCCTCGTAGTAGGCCTTGTC    | 811–831                       |
| GRLaV-2-Rev                                                | GCAACATTCAAGCCGTGGGCTG   | 1967–1988                     |
| GRLaV-3-For                                                | GCATAGTCCAGACAGTCGTTGTAC | 1728–1751                     |
| GRLaV-3-Rev                                                | GCCCAGAGATGTCGCCGACGTGC  | 2778–2800                     |
| GRLaV-4-For                                                | GTAGATTGAGGACGTATTGG     | 2601–2620                     |
| GRLaV-4-Rev                                                | CGCAAGAATACCACGTACCATGGG | 34–11                         |
| <b>For detection of viruses and viroids by PCR/RT-PCR:</b> |                          |                               |
| GVGF <sup>1</sup>                                          | CTCGTCGCATTTGTAAGA       | 255–272                       |
| GVGR <sup>1</sup>                                          | ACTGACAAGGCCTACTACG      | 793–811                       |
| GFLV-For                                                   | ACTGGTTTGACGTGGGTGAT     | 2224–2243 (RNA-2)             |
| GFLV-Rev                                                   | CCAAAGTTGGTTTCCAAGA      | 2526–2545 (RNA-2)             |
| GRSPaV-For                                                 | GATGAGGTTCAAGTTGTTTC     | 4372–4390                     |
| GRSPaV-Rev                                                 | TCACCAAATGTGAGAGTGAGCTG  | 4771–4793                     |
| HpSVd-For                                                  | GAGCCCCGGGGCAACTCTTCTC   | 74–95                         |
| HpSVd-Rev                                                  | TTTCTCAGGTAAGTACCTCCCTG  | 50–72                         |
| GYSVd-1-For                                                | TGCCTCCGCTAGTCGAGCGG     | 254–273                       |
| GYSVd-1-Rev                                                | CGACGACGAGGCTCACT        | 88–104                        |
| CEVd/CEYVd-For                                             | GGAAACCTGGAGGAAGGTG      | 9–27                          |
| CEVd/CEYVd Rev                                             | CCGGGTACATATTCACCGCGGCA  | 206–228                       |

GRLaV = Grapevine redleaf-associated virus, GRSPaV = *Grapevine rupestris stem pitting-associated virus*, GFLV = *Grapevine fanleaf virus*, HpSVd = *Hop stunt viroid*, GYSVd-1 = *Grapevine yellow speckle viroid 1*, GYSVd-2 = *Grapevine yellow speckle viroid 2*, CEVd = *Citrus exocortis viroid*, CEYVd = *Citrus exocortis Yucatan viroid*, For = forward (sense) primer, Rev = reverse (antisense) primer.

<sup>1</sup> Primers provided by Dr. M. R. Sudarshana, Research Biologist, USDA-ARS, Davis, CA 95616.

doi:10.1371/journal.pone.0147510.t001

There is an error regarding the presence of *Citrus exocortis yucatan viroid* (CEYVd) and *Citrus exocortis viroid* (CEVd) sequences. The sequences of *Citrus exocortis viroid* (CEVd) and *Citrus exocortis yucatan viroid* (CEYVd) originally listed in the NCBI database are wrongly annotated. *Citrus exocortis viroid* and *Citrus exocortis Yucatan viroid* are mitochondrial rRNA sequences. NCBI has removed CEVd (accession no. KC427103, KC427104) and CEYVd (accession no. KC427105, KC427106) sequences from GenBank.

[Table 1](#) and [S1 Fig](#) reference the incorrect CEVd and CEYVd sequences. Please see the corrected [Table 1](#) and [S1 Fig](#) here.

**Table 1. Classification of pathogen-specific sequence reads from symptomatic and non-symptomatic samples.**

| Category of sequence reads             | Reads from ribo-depleted cDNA library |               | Reads from dual-depleted cDNA library |              |
|----------------------------------------|---------------------------------------|---------------|---------------------------------------|--------------|
|                                        | Symptoms                              | No Symptoms   | Symptoms                              | No Symptoms  |
| <b>Reads mapped to specific virus</b>  |                                       |               |                                       |              |
| GRLaV                                  | 15,036                                | 0             | 406                                   | 0            |
| GFLV                                   | 14,383                                | 0             | 978                                   | 0            |
| GRSPaV                                 | 662                                   | 1,353         | 42                                    | 68           |
| <b>Reads mapped to specific viroid</b> |                                       |               |                                       |              |
| GYSVd-1                                | 13,914                                | 9,004         | 987                                   | 490          |
| HpSVd                                  | 1964                                  | 2980          | 164                                   | 185          |
| Others*                                | 8,029                                 | 2,931         | 655                                   | 1,616        |
| <b>Total</b>                           | <b>53,988</b>                         | <b>16,268</b> | <b>3,232</b>                          | <b>2,359</b> |

GRLaV = Grapevine redleaf-associated virus, GRSPaV = Grapevine rupestris stem pitting-associated virus, GFLV = Grapevine fanleaf virus, HpSVd = Hop stunt viroid, GYSVd-1 = Grapevine yellow speckle viroid 1.

\*Reads mismapped to virus- or viroid-like sequences.

Classification and abundance of high-throughput sequence reads obtained from ribo-depleted and dual-depleted cDNA libraries were determined by mapping the reads onto the virus/viroid database using mapping software BWA 0.6.

doi:10.1371/journal.pone.0147510.t002

## Supporting Information

**S1 Fig. Alignment of mapped contigs to respective genomes of Grapevine redleaf-associated virus, Grapevine fanleaf virus, Grapevine rupestris stem pitting-associated virus, Hop stunt viroid, Grapevine yellow speckle viroid 1, Citrus exocortis viroid and Citrus exocortis Yucatan viroid.** Nucleotide numbers of each virus and viroid genome is indicated at the top and bottom. Each bar represents the location of individual contigs aligning with the genome. (TIF)

## Reference

1. Poojari S, Alabi OJ, Fofanov VY, Naidu RA (2013) A Leafhopper-Transmissible DNA Virus with Novel Evolutionary Lineage in the Family *Geminiviridae* Implicated in Grapevine Redleaf Disease by Next-Generation Sequencing. PLoS ONE 8(6): e64194. doi:[10.1371/journal.pone.0064194](https://doi.org/10.1371/journal.pone.0064194) PMID: [23755117](https://pubmed.ncbi.nlm.nih.gov/23755117/)
